# Supplementary figures and images for: Combining mutation and recombination statistics to infer clonal families in antibody repertoires
Source: eLife journal article supplement (doi:10.7554/elife.86181), 2024-08-07

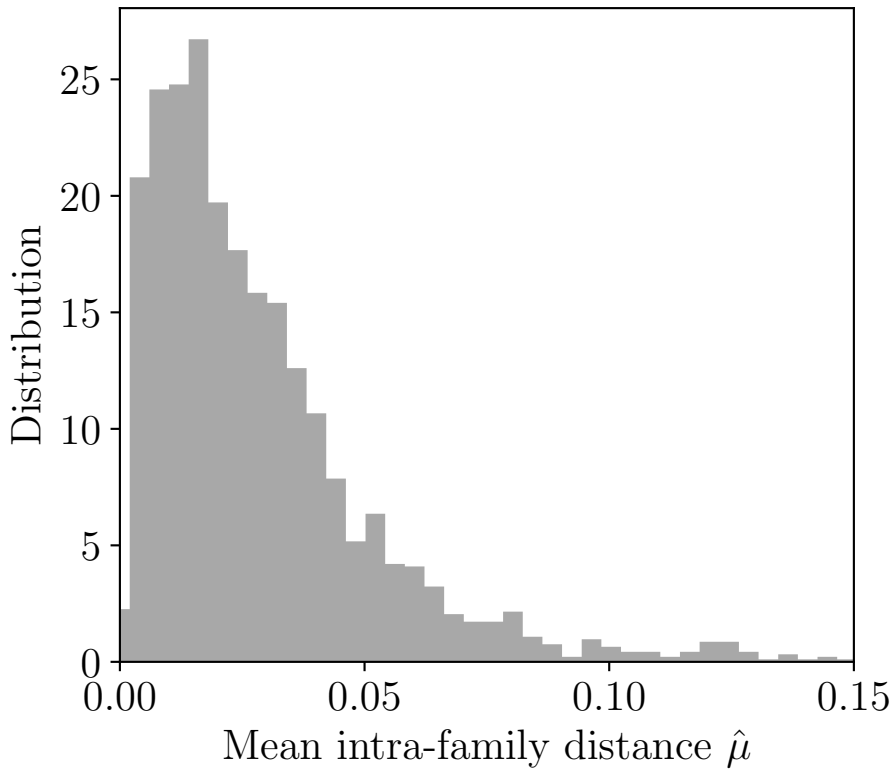

Supplement: supp [file elife_poa_e86181_Figure_2_figure_supplement_1.pdf › elife_poa_e86181_Figure_2_figure_supplement_1.pdf]

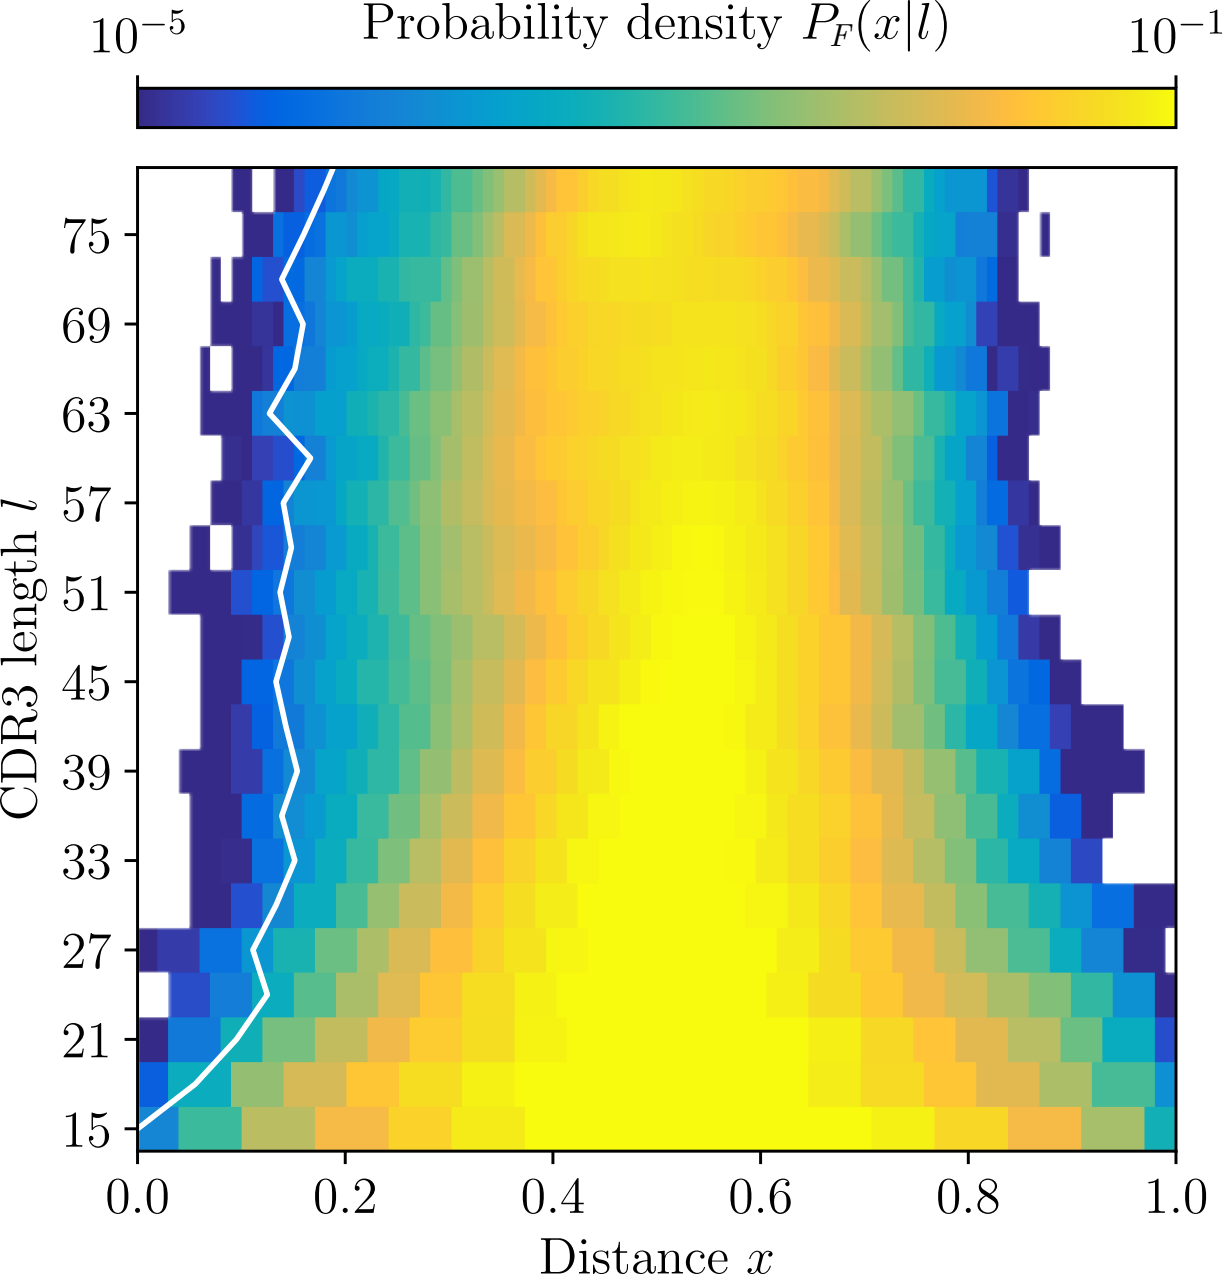

Supplement: supp [file elife_poa_e86181_Figure_2_figure_supplement_2.pdf › elife_poa_e86181_Figure_2_figure_supplement_2.pdf]

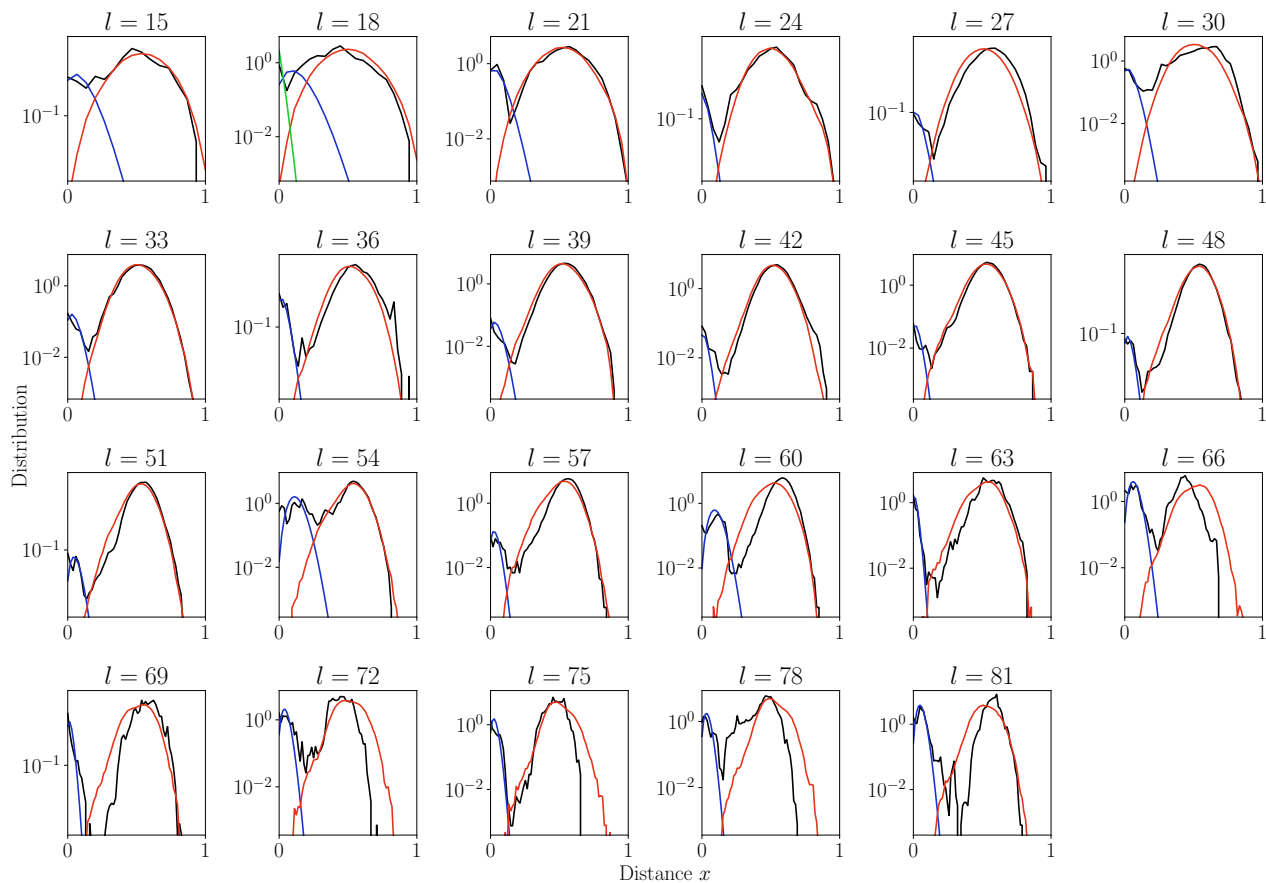

Supplement: supp [file elife_poa_e86181_Figure_2_figure_supplement_3.pdf › elife_poa_e86181_Figure_2_figure_supplement_3.pdf]

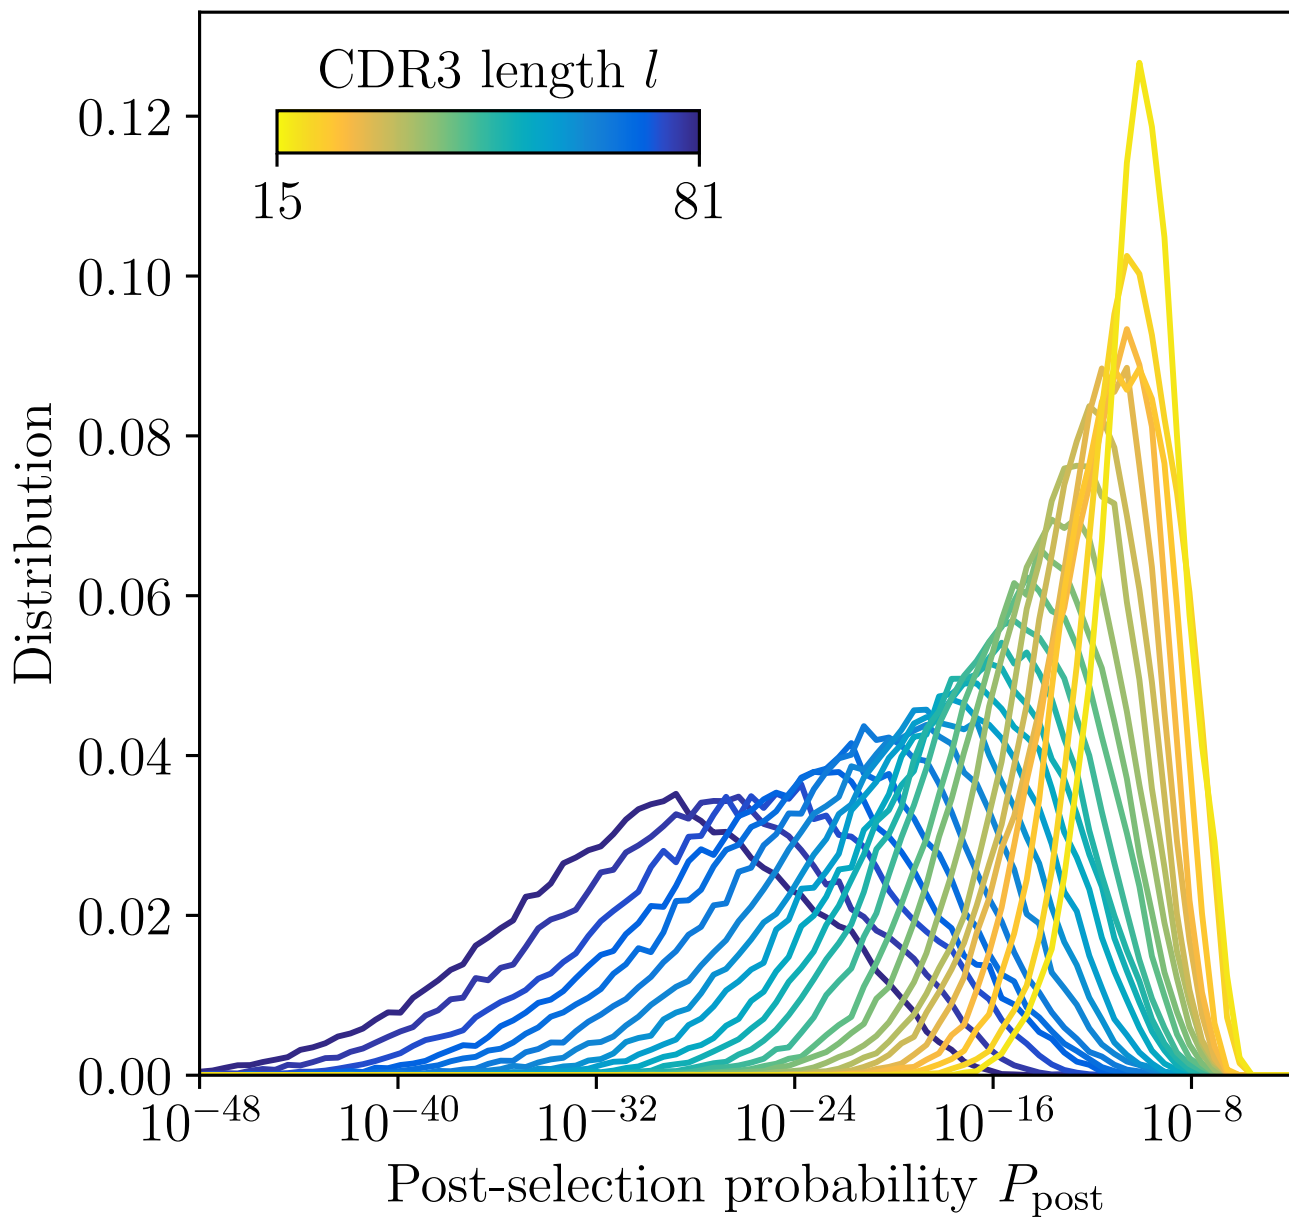

Supplement: supp [file elife_poa_e86181_Figure_2_figure_supplement_4.pdf › elife_poa_e86181_Figure_2_figure_supplement_4.pdf]

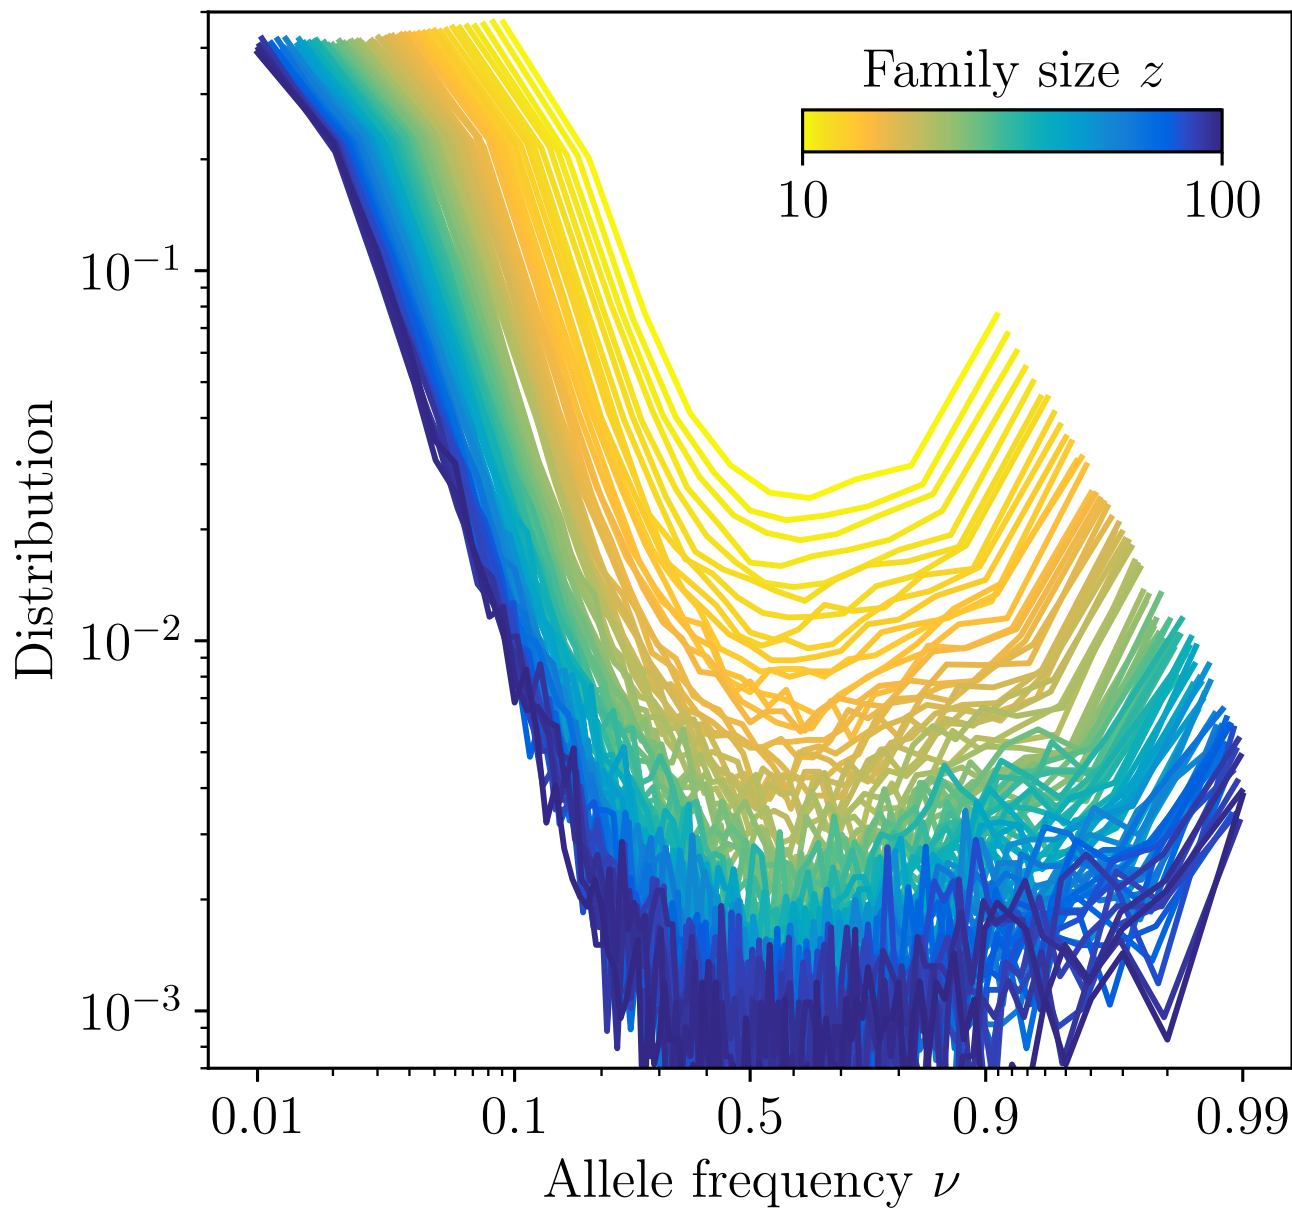

Supplement: supp [file elife_poa_e86181_Figure_2_figure_supplement_5.pdf › elife_poa_e86181_Figure_2_figure_supplement_5.pdf]

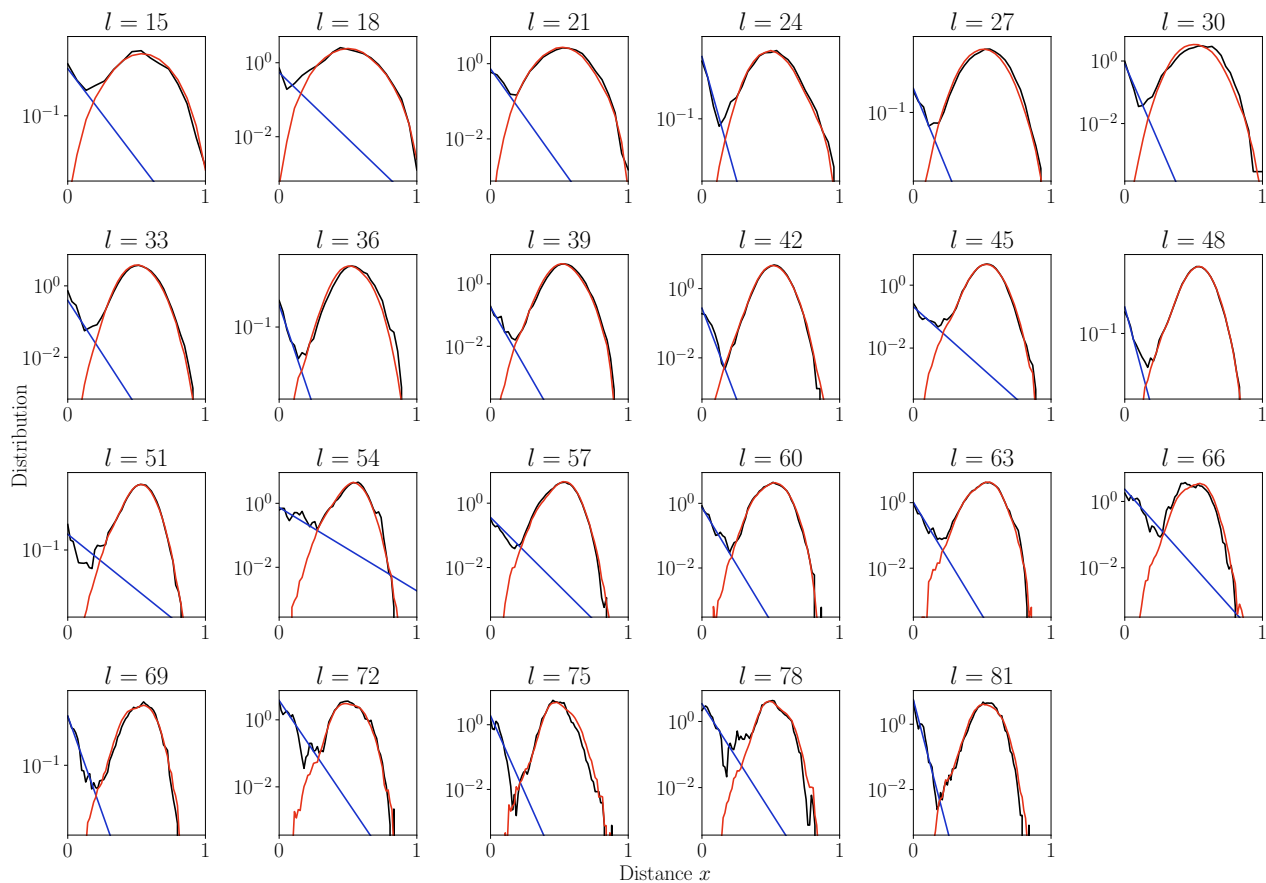

Supplement: supp [file elife_poa_e86181_Figure_2_figure_supplement_6.pdf › elife_poa_e86181_Figure_2_figure_supplement_6.pdf]

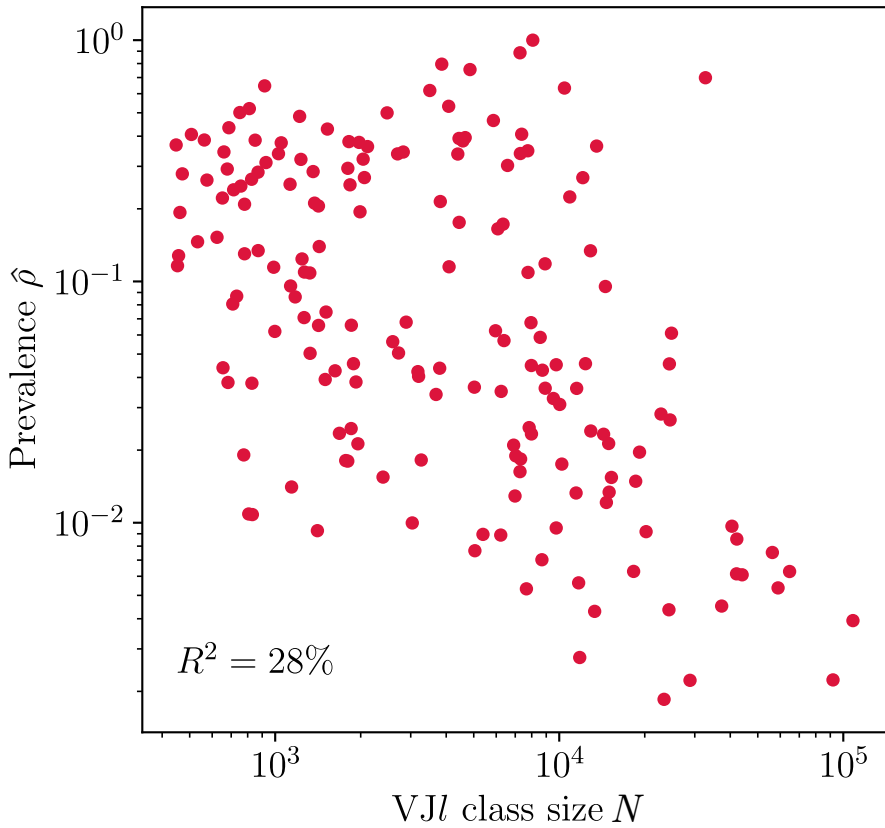

Supplement: supp [file elife_poa_e86181_Figure_2_figure_supplement_7.pdf › elife_poa_e86181_Figure_2_figure_supplement_7.pdf]

VJL class 1

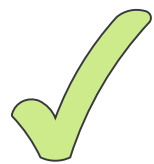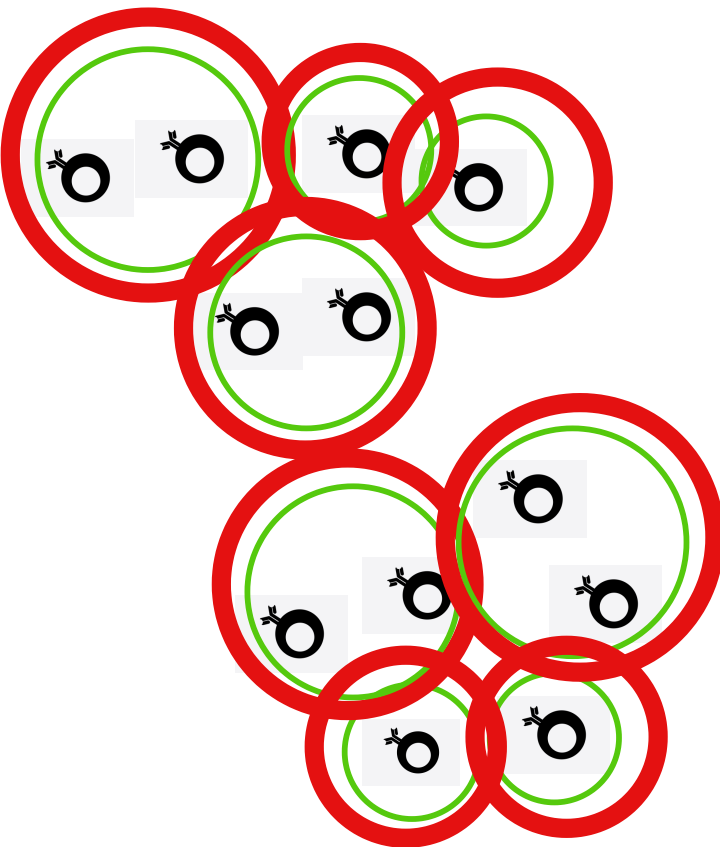

VJL class 2

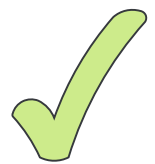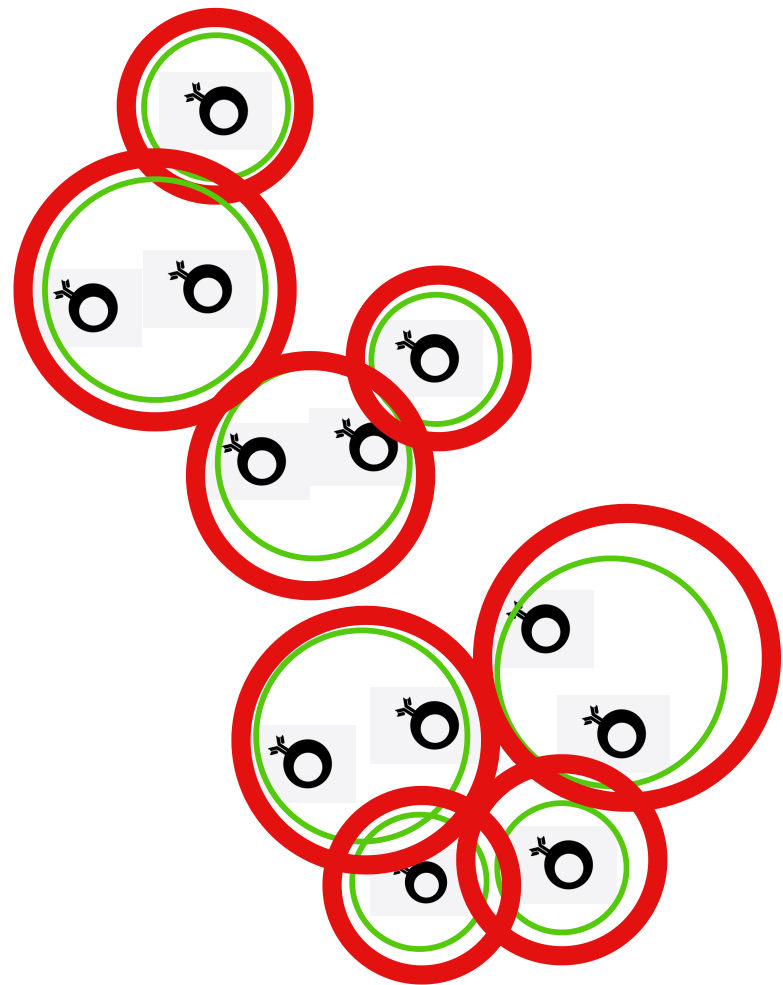

VJL class 3

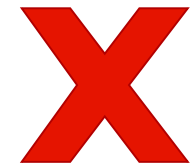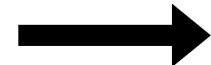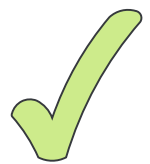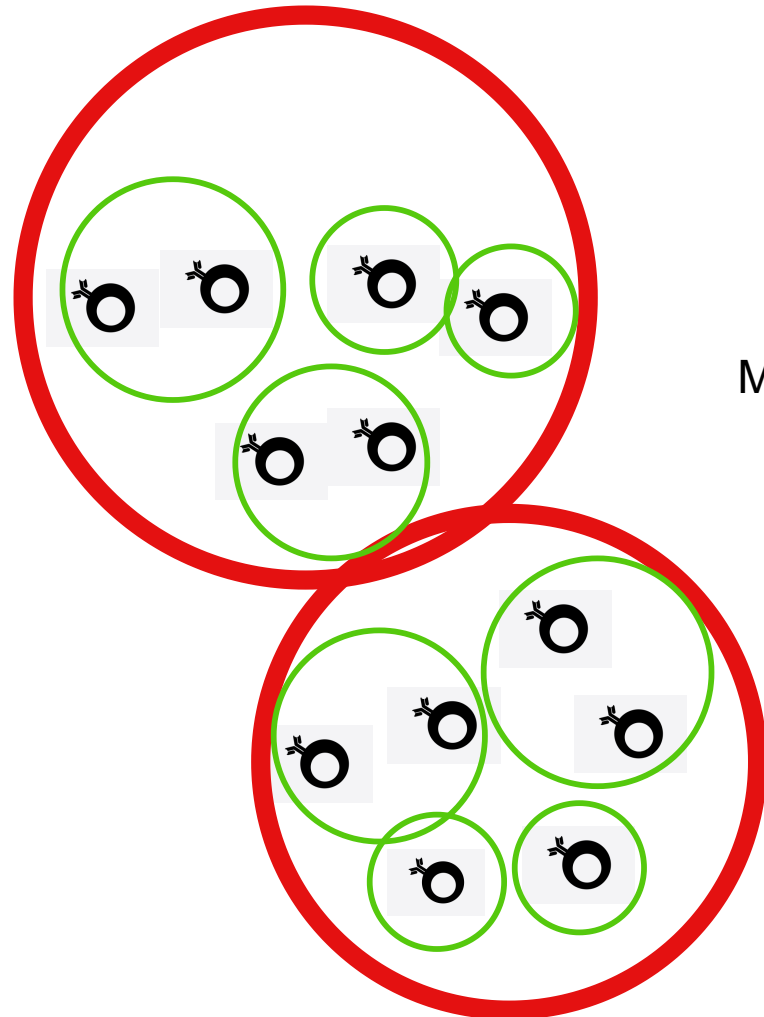

Merge precise  
partition

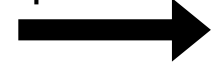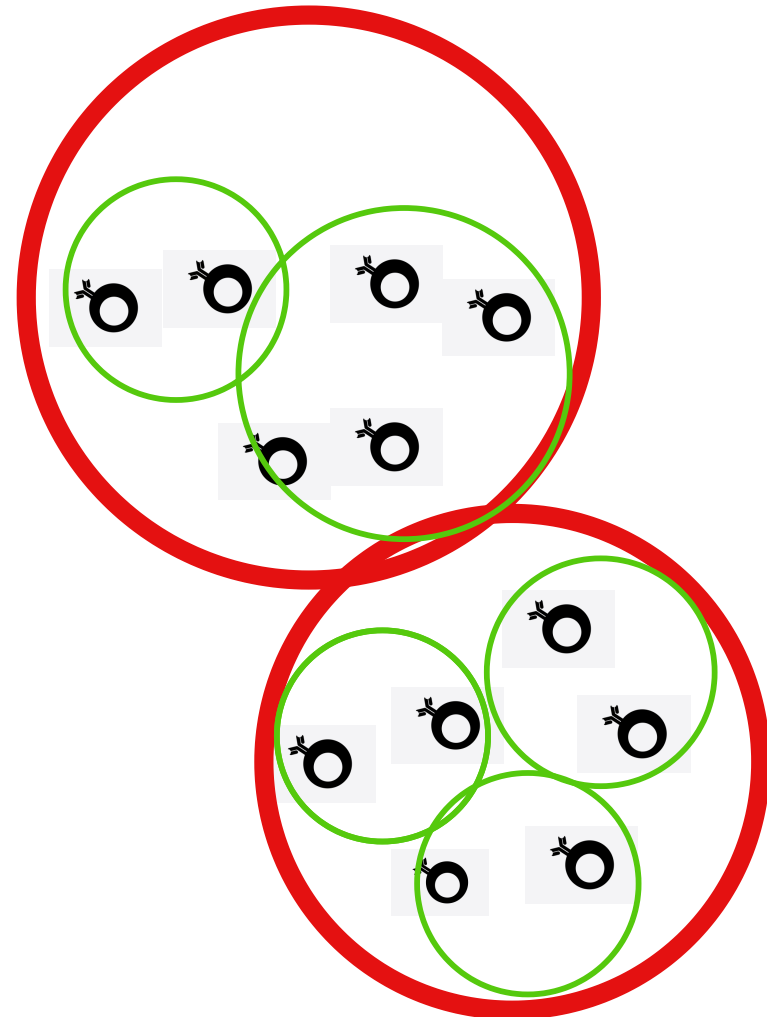

Supplement: supp [file elife_poa_e86181_Figure_3_figure_supplement_1.pdf › elife_poa_e86181_Figure_3_figure_supplement_1.pdf]

**A**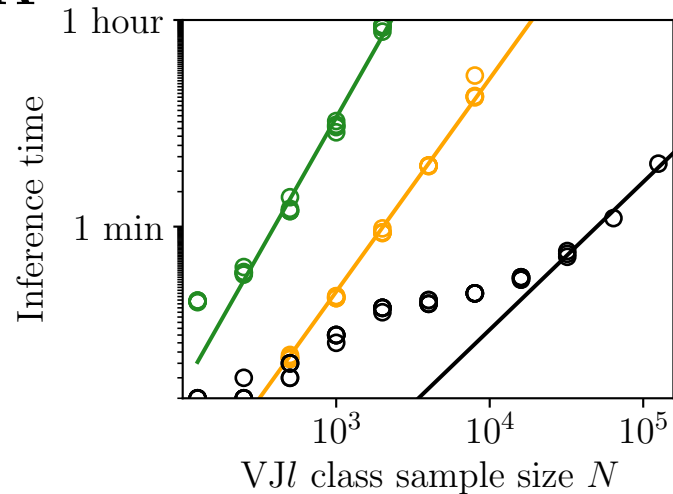**B**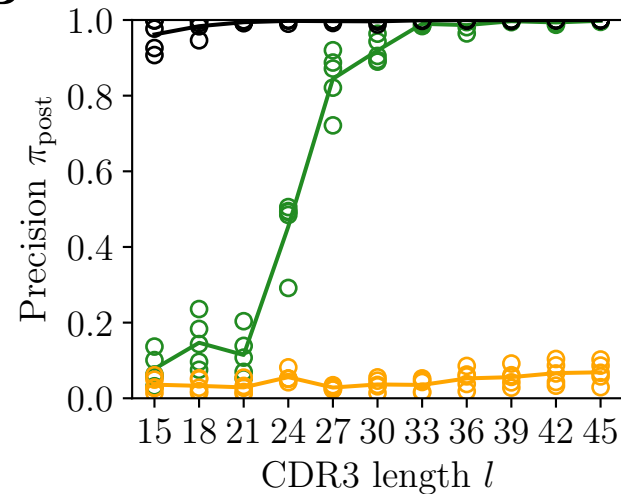**C**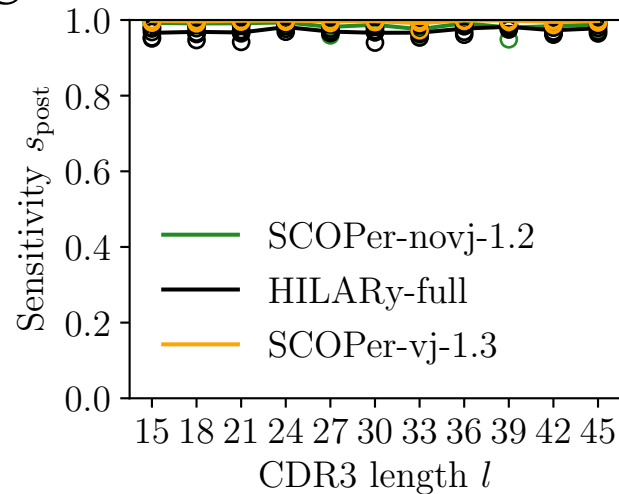**D**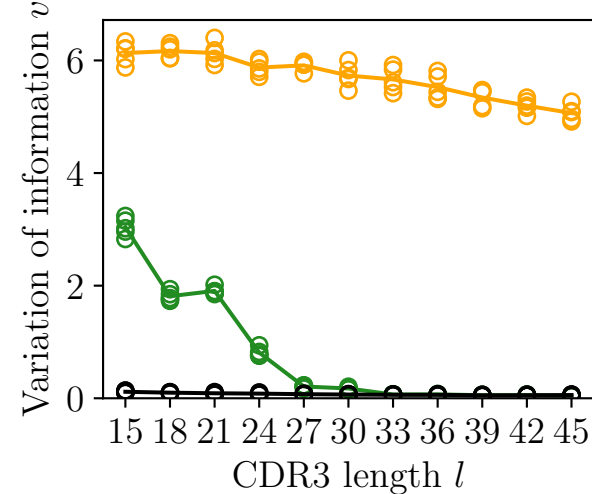

Supplement: supp [file elife_poa_e86181_Figure_4_figure_supplement_1.pdf › elife_poa_e86181_Figure_4_figure_supplement_1.pdf]

**A**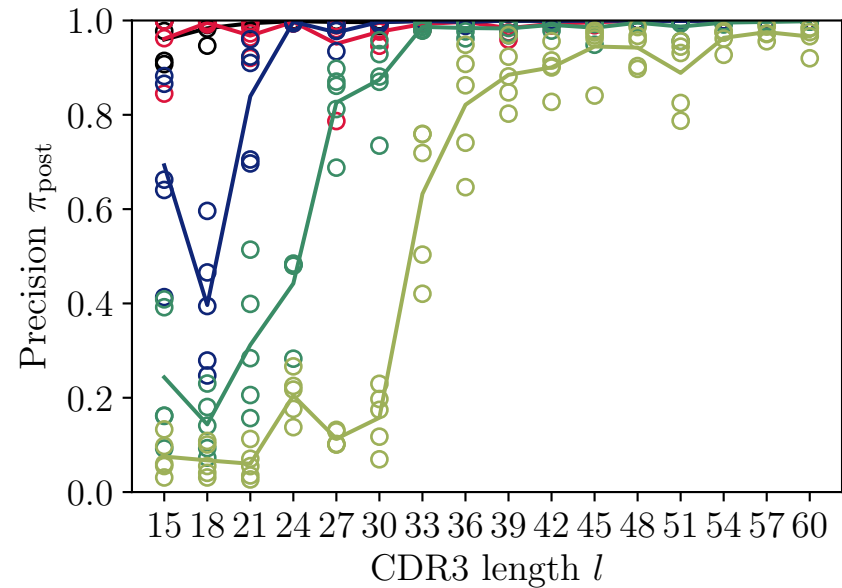**B**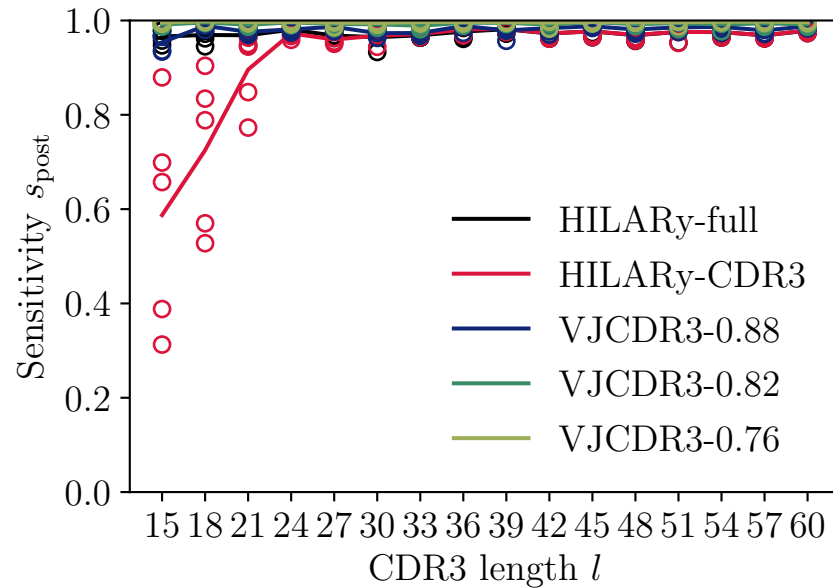**C**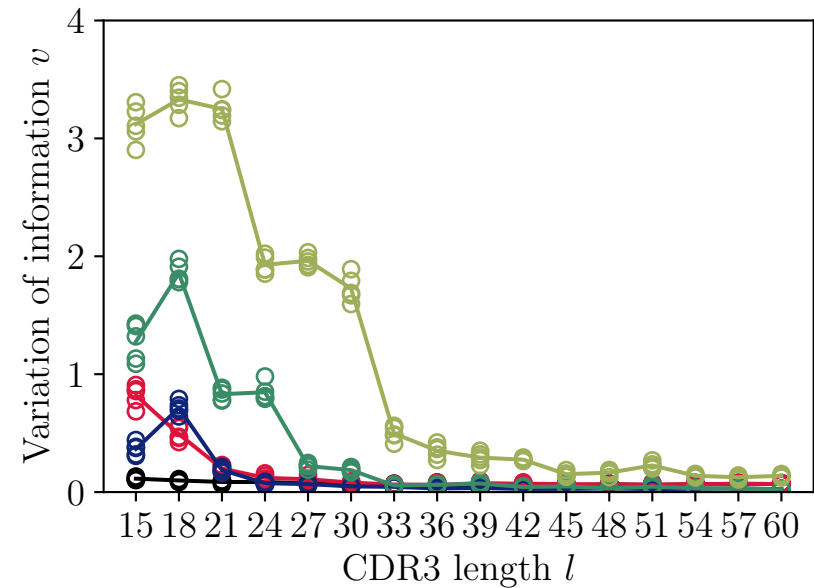**D**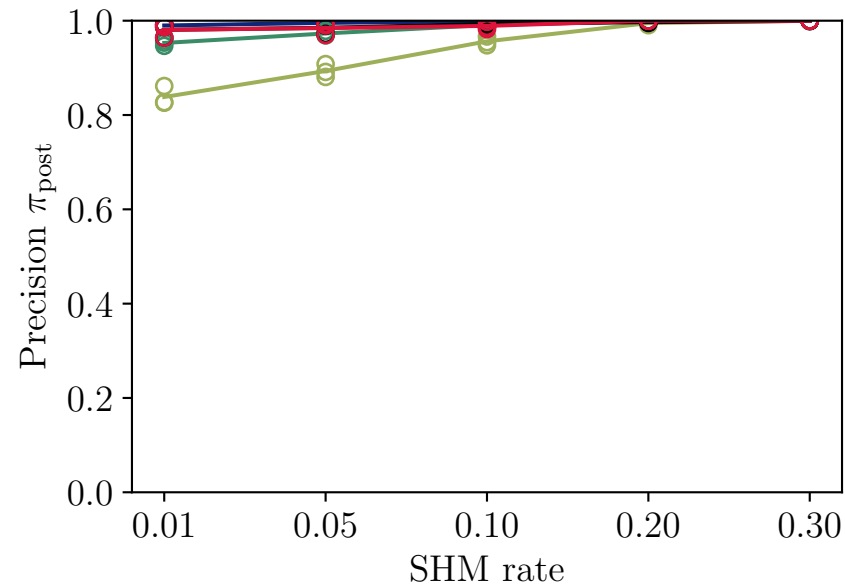**E**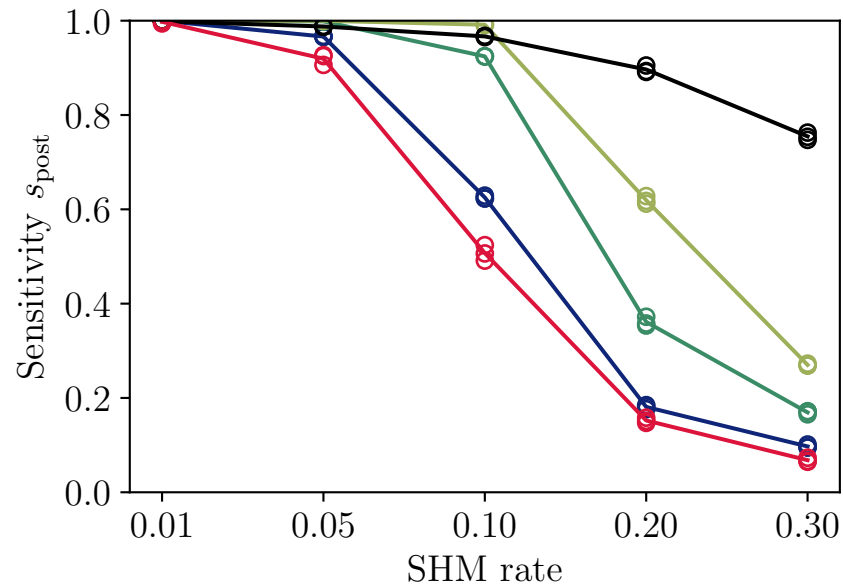**F**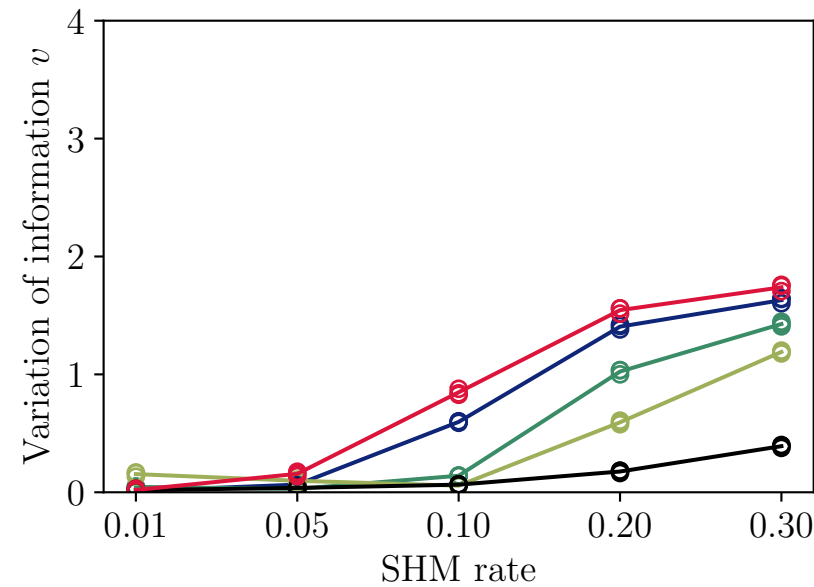

Supplement: supp [file elife_poa_e86181_Figure_4_figure_supplement_2.pdf › elife_poa_e86181_Figure_4_figure_supplement_2.pdf]
